# Supplementary material
Source: publisher site journal article supplement (https://www.degruyterbrill.com/publication/isbn/9783110263343/downloadAsset/9783110263343_Contents.pdf)
Supplement: Supplementary file 1 [file 9783110263343_Contents.pdf]

# Contents

|                                                                             |           |
|-----------------------------------------------------------------------------|-----------|
| Preface                                                                     | vii       |
| <b>1 Introduction and preliminaries</b>                                     | <b>1</b>  |
| 1.1 Background information                                                  | 1         |
| 1.2 Terminology and notation                                                | 1         |
| 1.3 Narrow operators on function spaces                                     | 2         |
| 1.4 Homogeneous measure spaces and Maharam's theorem                        | 9         |
| 1.5 Necessary information on vector lattices                                | 12        |
| 1.6 Kalton's and Rosenthal's representation theorems for operators on $L_1$ | 21        |
| <b>2 Each "small" operator is narrow</b>                                    | <b>24</b> |
| 2.1 AM-compact and Dunford–Pettis operators are narrow                      | 24        |
| 2.2 "Large" subspaces are exactly strictly rich                             | 26        |
| 2.3 Operators with "small" ranges are narrow                                | 28        |
| 2.4 Narrow operators are compact on a suitable subspace                     | 32        |
| <b>3 Applications to nonlocally convex spaces</b>                           | <b>36</b> |
| 3.1 Nonexistence of nonzero narrow operators                                | 37        |
| 3.2 The separable quotient space problem                                    | 38        |
| 3.3 Isomorphic classification of strongly nonconvex Köthe F-spaces          | 38        |
| <b>4 Noncompact narrow operators</b>                                        | <b>41</b> |
| 4.1 Conditional expectation operators                                       | 42        |
| 4.2 A narrow projection from $E$ onto a subspace isometric to $E$           | 43        |
| 4.3 A characterization of narrow conditional expectations                   | 51        |
| <b>5 Ideal properties, conjugates, spectrum and numerical radii</b>         | <b>57</b> |
| 5.1 Ideal properties of narrow operators and stability of rich subspaces    | 57        |
| 5.2 Conjugates of narrow operators need not be narrow                       | 60        |
| 5.3 Spectrum of a narrow operator                                           | 60        |
| 5.4 Numerical radii of narrow operators on $L_p(\mu)$ -spaces               | 62        |

|           |                                                                                                        |     |
|-----------|--------------------------------------------------------------------------------------------------------|-----|
| <b>6</b>  | <b>Daugavet-type properties of Lebesgue and Lorentz spaces</b>                                         | 71  |
| 6.1       | A generalization of the DP for $L_1$ to “small” into isomorphisms . . . . .                            | 72  |
| 6.2       | Pseudo-Daugavet property for narrow operators on $L_p$ , $p \neq 2$ . . . . .                          | 77  |
| 6.3       | A pseudo-Daugavet property for narrow projections in Lorentz spaces                                    | 89  |
| 6.4       | Near isometric classification of $L_p(\mu)$ -spaces for $1 \leq p < \infty$ , $p \neq 2$               | 104 |
| <b>7</b>  | <b>Strict singularity versus narrowness</b>                                                            | 109 |
| 7.1       | Bourgain–Rosenthal’s theorem on $\ell_1$ -strictly singular operators . . . . .                        | 111 |
| 7.2       | Rosenthal’s characterization of narrow operators on $L_1$ . . . . .                                    | 132 |
| 7.3       | Johnson–Maurey–Schechtman–Tzafriri’s theorem . . . . .                                                 | 150 |
| 7.4       | An application to almost isometric copies of $L_1$ . . . . .                                           | 171 |
| 7.5       | An application to complemented subspaces of $L_p$ . . . . .                                            | 173 |
| 7.6       | The Daugavet property for rich subspaces of $L_1$ . . . . .                                            | 174 |
| <b>8</b>  | <b>Weak embeddings of <math>L_1</math></b>                                                             | 179 |
| 8.1       | Definitions . . . . .                                                                                  | 179 |
| 8.2       | Embeddability of $L_1$ . . . . .                                                                       | 181 |
| 8.3       | Examples . . . . .                                                                                     | 184 |
| 8.4       | $G_\delta$ -embeddings of $L_1$ are not narrow . . . . .                                               | 190 |
| 8.5       | Sign-embeddability of $L_1$ does not imply isomorphic embeddability                                    | 194 |
| <b>9</b>  | <b>Spaces <math>X</math> for which every operator <math>T \in \mathcal{L}(L_p, X)</math> is narrow</b> | 210 |
| 9.1       | A characterization using the ranges of vector measures . . . . .                                       | 210 |
| 9.2       | Every operator from $E$ to $c_0(\Gamma)$ is narrow . . . . .                                           | 214 |
| 9.3       | An analog of the Pitt compactness theorem for $L_p$ -spaces . . . . .                                  | 215 |
| 9.4       | When is every operator from $L_p$ to $\ell_r$ narrow? . . . . .                                        | 216 |
| 9.5       | $\ell_2$ -strictly singular operators on $L_p$ . . . . .                                               | 225 |
| <b>10</b> | <b>Narrow operators on vector lattices</b>                                                             | 229 |
| 10.1      | Two definitions of a narrow operator on vector lattices . . . . .                                      | 230 |
| 10.2      | AM-compact order-to-norm continuous operators are narrow . . . . .                                     | 234 |
| 10.3      | $T$ is narrow if and only if $ T $ is narrow . . . . .                                                 | 238 |
| 10.4      | The Enflo–Starbird function and $\lambda$ -narrow operators . . . . .                                  | 241 |
| 10.5      | Classical theorems . . . . .                                                                           | 243 |
| 10.6      | Pseudonarrow operators are exactly $\lambda$ -narrow operators . . . . .                               | 246 |
| 10.7      | Regular narrow operators form a band in the lattice of regular operators . . . . .                     | 250 |

---

|           |                                                                    |            |
|-----------|--------------------------------------------------------------------|------------|
| 10.8      | Narrow operators on lattice-normed spaces . . . . .                | 252        |
| 10.9      | $\ell_2$ -strictly singular regular operators are narrow . . . . . | 260        |
| <b>11</b> | <b>Some variants of the notion of narrow operators</b> . . . . .   | <b>265</b> |
| 11.1      | Hereditarily narrow operators . . . . .                            | 266        |
| 11.2      | Gentle narrow operators on $L_p$ with $1 < p \leq 2$ . . . . .     | 274        |
| 11.3      | C-narrow operators on $C(K)$ -spaces . . . . .                     | 281        |
| 11.4      | Narrow operators on $L_\infty(\mu)$ -spaces . . . . .              | 289        |
| 11.5      | Narrow 2-homogeneous polynomials . . . . .                         | 301        |
| <b>12</b> | <b>Open problems</b> . . . . .                                     | <b>303</b> |
|           | Bibliography . . . . .                                             | 307        |
|           | Index of names . . . . .                                           | 315        |
|           | Subject index . . . . .                                            | 317        |
